# Supplementary material for: Calibration, explainability and spatial uncertainty for YOLO-based detection in panoramic dental radiography
Source: Research Square preprint supplement (doi:10.21203/rs.3.rs-8700851/v1), 2026-02-10
Supplement: Supplementary file 1 [file fc8755fbd2089e74a7968871.pdf]

# Supplementary Materials

## Calibration, explainability and spatial uncertainty for YOLO-based detection in panoramic dental radiography

Hanan Alaskar and Nikos Nikolaou

Department of Physics and Astronomy, University College London (UCL), London, United Kingdom

*Correspondence:* hanan.alaskar.24@ucl.ac.uk

### Supplementary Tables and Figures

Table S1: Calibration performance of YOLOv11s at IoU thresholds 0.3, 0.5, and 0.7. Metrics include Adaptive Expected Calibration Error (ECE) and Negative Log-Likelihood (NLL) for pooled (overall) and per-class results. Best values per IoU/method are in bold.

| IoU | Method | Overall       |               | Cavity        |               | Implant       |               | Fillings |               | Impacted Tooth |               |
|-----|--------|---------------|---------------|---------------|---------------|---------------|---------------|----------|---------------|----------------|---------------|
|     |        | ECE           | NLL           | ECE           | NLL           | ECE           | NLL           | ECE      | NLL           | ECE            | NLL           |
| 0.3 | Uncal. | 0.0329        | 0.2653        | 0.0435        | 0.2279        | 0.0580        | 0.1897        | 0.0350   | 0.2915        | 0.0518         | 0.2963        |
|     | Temp.  | 0.0345        | 0.2594        | 0.0493        | 0.2143        | <b>0.0264</b> | 0.1764        | 0.0393   | 0.2897        | 0.0561         | 0.2898        |
|     | Platt  | <b>0.0325</b> | <b>0.2545</b> | <b>0.0235</b> | <b>0.2019</b> | 0.0313        | <b>0.1647</b> | 0.0404   | <b>0.2882</b> | 0.0625         | <b>0.2882</b> |
| 0.5 | Uncal. | 0.0333        | 0.2636        | 0.0459        | 0.2259        | 0.0552        | 0.1948        | 0.0337   | 0.2918        | 0.0447         | 0.2529        |
|     | Temp.  | 0.0394        | 0.2585        | 0.0515        | 0.2128        | <b>0.0264</b> | 0.1836        | 0.0394   | 0.2901        | 0.0456         | 0.2524        |
|     | Platt  | <b>0.0339</b> | <b>0.2536</b> | <b>0.0259</b> | <b>0.1990</b> | 0.0287        | <b>0.1726</b> | 0.0404   | <b>0.2887</b> | 0.0511         | <b>0.2519</b> |
| 0.7 | Uncal. | 0.0357        | 0.2686        | 0.0580        | 0.2100        | 0.0422        | 0.2114        | 0.0386   | 0.3022        | 0.0556         | 0.2314        |
|     | Temp.  | 0.0469        | 0.2643        | 0.0632        | 0.2010        | <b>0.0330</b> | 0.2059        | 0.0438   | 0.2991        | 0.0549         | 0.2313        |
|     | Platt  | <b>0.0316</b> | <b>0.2590</b> | <b>0.0209</b> | <b>0.1744</b> | 0.0365        | <b>0.2051</b> | 0.0390   | <b>0.2984</b> | <b>0.0436</b>  | <b>0.2295</b> |

Table S2: Sample counts per class–case pair in the Pixel-Level Explanation Dataset. Each sample corresponds to one detection used for coverage and validity analysis. TP = True Positive, FP = False Positive, FN = False Negative.

| Class              | TP         | FP         | FN        | Total      |
|--------------------|------------|------------|-----------|------------|
| Cavity             | 26         | 35         | 17        | 78         |
| Impacted Tooth     | 31         | 13         | 7         | 51         |
| Implant            | 156        | 16         | 3         | 175        |
| Fillings           | 330        | 129        | 42        | 501        |
| <b>All classes</b> | <b>543</b> | <b>193</b> | <b>69</b> | <b>805</b> |

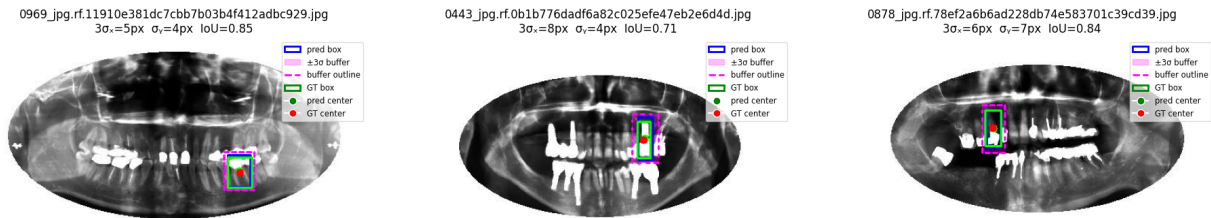

(a) Cluster 0 example ( $\sigma_x \approx 2.25$ ,  $\sigma_y \approx 1.35$ ), (b) Cluster 1 example ( $\sigma_x \approx 2.9$ ,  $\sigma_y \approx 1.5$ ), (c) Cluster 2 example ( $\sigma_x \approx 2.45$ ,  $\sigma_y \approx 2.6$ ).

Figure S1: Representative detections from different uncertainty clusters, showing predicted boxes (solid blue), ground-truth boxes (solid green), and  $\pm 3\sigma$  buffers (dashed purple). Smaller uncertainties correspond to confident, high-contrast detections, whereas larger ones occur for ambiguous or overlapping regions.
